# Supplementary material
Source: publisher site journal article supplement (https://www.spandidos-publications.com/7801/downloadSupplementary)
Supplement: Supplementary file 1 [file downloadSupplementary]

Table SI. Subgroup analysis stratifying patients by TACE exposure.

| Outcome                     | Non-TACE (n=29) | TACE (n=10)    | P-value |
|-----------------------------|-----------------|----------------|---------|
| ORR, n (%)                  | 11 (37.9)       | 3 (30.0)       | 0.721   |
| DCR, n (%)                  | 25 (86.2)       | 7 (70.0)       | 0.344   |
| Median PFS (95% CI), months | 24.0 (6.5-41.5) | 8.0 (0.0-35.4) | 0.535   |
| Median OS (95% CI), months  | Not reached     | Not reached    | 0.227   |

Non-TACE was defined as 0 treatments with TACE, and TACE was defined as 1 or 2 treatments with TACE. TACE, transarterial chemoembolization; ORR, objective response rate; DCR, disease control rate; PFS, progression-free survival; OS, overall survival; CI, confidence interval.
